# Supplementary material for: NAD+-Consuming Enzymes in Stem Cell Homeostasis
Source: Hindawi journal article supplement (doi:10.1155/2023/4985726), 2023-02-08

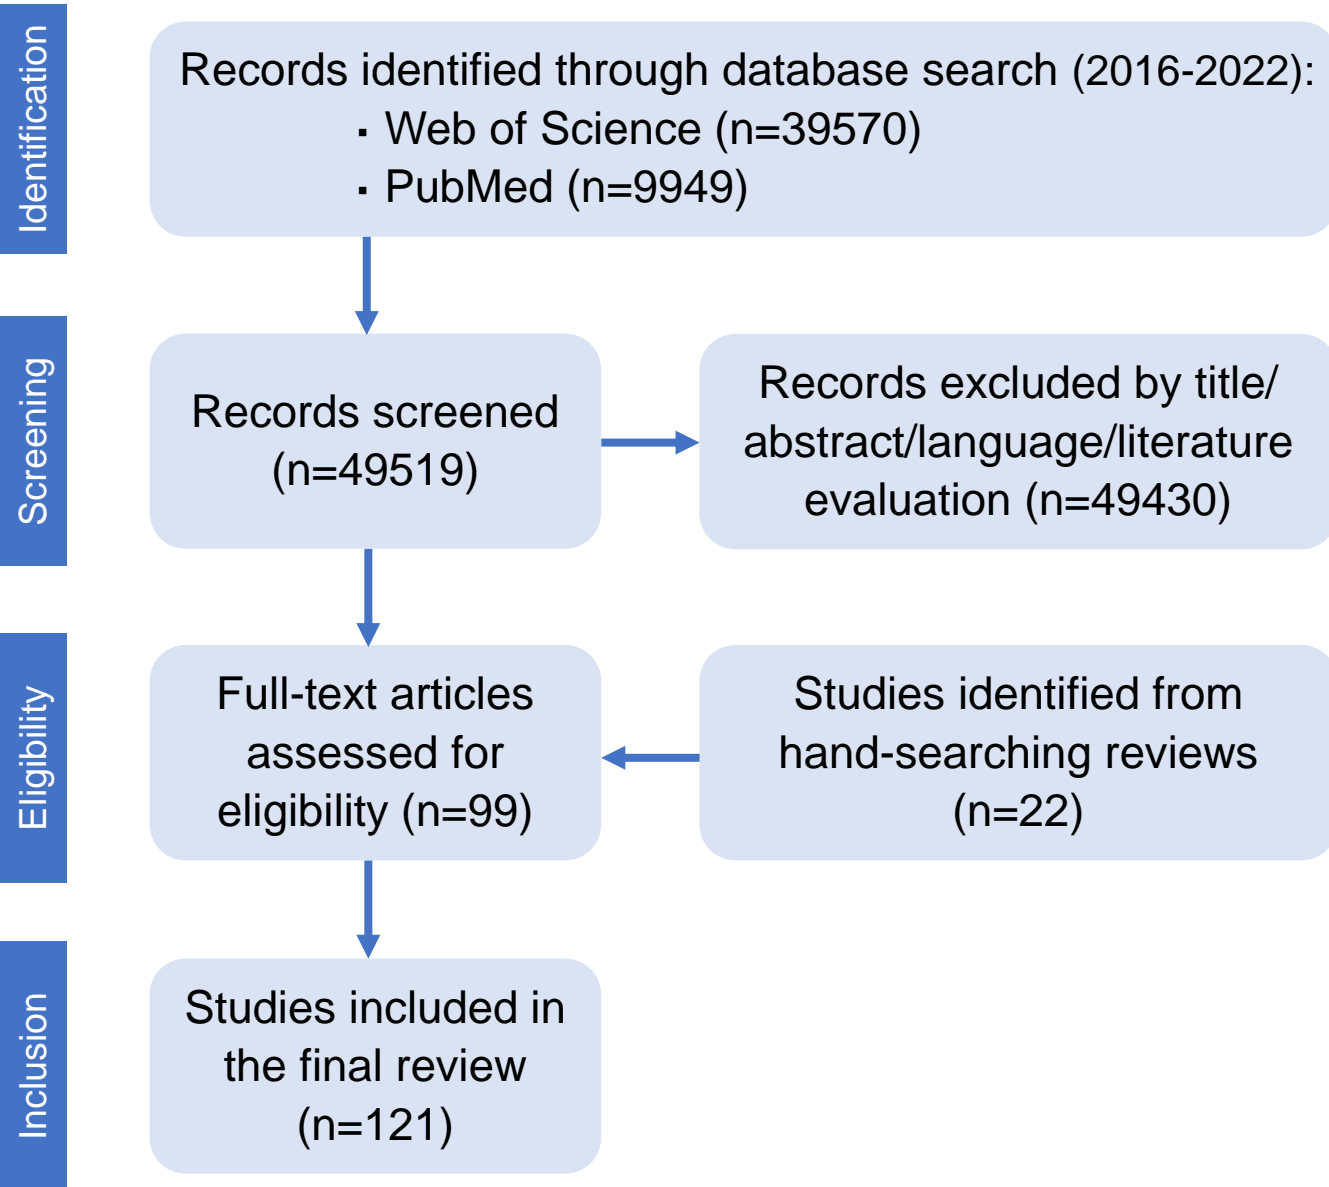

Supplement: f1 [file 4985726.f1.pdf]
